# Supplementary material for: The Safety Profile of Hepatectomy Following Preoperative Systemic Therapy with Lenvatinib Plus Anti-PD-1 Antibodies Versus Hepatectomy Alone in Patients With Hepatocellular Carcinoma
Source: PubMed Central journal article supplement — Ann Surg Open. 2022 May 2;3(2):e163. doi: 10.1097/AS9.0000000000000163 (PMC10431521; doi:10.1097/as9.0000000000000163), 2022-05-02
Supplement: as9-3-e163-s001.pdf [file as9-3-e163-s001.pdf]

**Supplemental table 1. Comparisons of patient baseline characteristics and operative variables before and after PSM.**

| Characteristic                     | Before PSM             |                        |                | After PSM              |                         |                |
|------------------------------------|------------------------|------------------------|----------------|------------------------|-------------------------|----------------|
|                                    | PSTH<br>(n = 49)       | UH<br>(n = 2318)       | <i>P</i> value | PSTH (n = 49)          | UH (n = 98)             | <i>P</i> value |
| <b>Age, years</b>                  | 56.0 (34.0–<br>77.0)   | 58.0 (20.0–<br>87.0)   | 0.062          | 56.0 (34.0–<br>77.0)   | 54.0 (43.0–<br>65.0)    | 0.941          |
| <b>Gender</b>                      |                        |                        | 0.544          |                        |                         | 0.862          |
| <b>Male</b>                        | 43                     | 1961                   |                | 43                     | 85                      |                |
| <b>Female</b>                      | 6                      | 357                    |                | 6                      | 13                      |                |
| <b>AFP, ng/mL</b>                  |                        |                        | 0.001**        |                        |                         | 0.848          |
| <b>&lt; 20</b>                     | 30                     | 1080                   |                | 30                     | 58                      |                |
| <b>20–400</b>                      | 11                     | 614                    |                | 11                     | 26                      |                |
| <b>&gt; 400</b>                    | 8                      | 624                    |                | 8                      | 14                      |                |
| <b>HB, g/L</b>                     | 130.7 (85.0–<br>160.0) | 141.3 (55.0–<br>200.0) | 0.001**        | 130.7 (85.0–<br>160.0) | 132.4 (111.2–<br>153.6) | 0.449          |
| <b>TB, <math>\mu</math>mol/L</b>   | 12.3 (3.5–26.9)        | 14.4 (1.9–<br>249.6)   | 0.051          | 12.3 (3.5–26.9)        | 12.8 (7.1–<br>18.5)     | 0.582          |
| <b>ALB, g/L</b>                    | 38.9 (32.8–<br>51.0)   | 42.4 (29.6–<br>55.0)   | 0.001**        | 38.9 (32.8–<br>51.0)   | 39.1 (35.3–<br>42.9)    | 0.325          |
| <b>ALT, U/L</b>                    | 34.8 (6.3–<br>236.0)   | 38.9 (5.2–<br>883.0)   | 0.011*         | 34.8 (6.3–<br>236.0)   | 28.5 (22.4–<br>34.6)    | 0.206          |
| <b>AST, U/L</b>                    | 39.6 (13.0–<br>146.0)  | 34.5 (10.2–<br>280.5)  | 0.416          | 39.6 (13.0–<br>146.0)  | 35.0 (30.7–<br>39.3)    | 0.839          |
| <b><math>\gamma</math>-GT, U/L</b> | 73.7 (11.0–<br>242.0)  | 85.8 (6.0–<br>1448.0)  | 0.363          | 73.7 (11.0–<br>242.0)  | 68.3 (59.4–<br>77.2)    | 0.788          |
| <b>HBsAg</b>                       |                        |                        | 0.665          |                        |                         | 0.580          |

|                               |                 |                 |         |                 |                  |       |
|-------------------------------|-----------------|-----------------|---------|-----------------|------------------|-------|
| <b>Positive</b>               | 39              | 1784            |         | 39              | 74               |       |
| <b>Negative</b>               | 10              | 534             |         | 10              | 24               |       |
| <b>HCV-RNA</b>                |                 |                 | 0.001** |                 |                  | 1.000 |
| <b>Positive</b>               | 0               | 72              |         | 0               | 0                |       |
| <b>Negative</b>               | 49              | 2246            |         | 49              | 98               |       |
| <b>PT, s</b>                  | 12.6 (9.9–15.1) | 12.0 (9.4–17.4) | 0.001** | 12.6 (9.9–15.1) | 12.7 (11.7–13.7) | 0.562 |
| <b>INR</b>                    | 1.1 (0.91–1.34) | 1.1 (0.85–1.54) | 0.004** | 1.1 (0.91–1.34) | 1.1 (1.0–1.2)    | 0.642 |
| <b>Ascites</b>                |                 |                 | 0.013*  |                 |                  | 0.132 |
| <b>None</b>                   | 42              | 2178            |         | 42              | 89               |       |
| <b>Mild</b>                   | 7               | 105             |         | 7               | 6                |       |
| <b>Moderate</b>               | 0               | 34              |         | 0               | 3                |       |
| <b>Severe</b>                 | 0               | 1               |         | 0               | 0                |       |
| <b>Cirrhosis</b>              |                 |                 | 0.865   |                 |                  | 0.461 |
| <b>None</b>                   | 10              | 455             |         | 10              | 28               |       |
| <b>Mild</b>                   | 21              | 1020            |         | 21              | 38               |       |
| <b>Moderate</b>               | 16              | 684             |         | 16              | 24               |       |
| <b>Severe</b>                 | 2               | 159             |         | 2               | 8                |       |
| <b>No. of tumors</b>          |                 |                 | 0.005** |                 |                  | 0.480 |
| <b>Single</b>                 | 26              | 1657            |         | 26              | 58               |       |
| <b>Multiple</b>               | 23              | 661             |         | 23              | 40               |       |
| <b>Maximum tumor size, cm</b> | 7.5 (3.8–18)    | 5.5 (0.5–23)    | 0.001** | 7.5 (3.8–18)    | 7.8 (2.7–12.9)   | 0.470 |

Values are presented as median (range). Pearson  $\chi^2$ , Fisher's exact, and Mann-Whitney U (Wilcoxon rank sum test) tests were used, as appropriate; \* $P < 0.05$ , \*\* $P < 0.01$ . PSM, propensity score matching; PSTH, preoperative systemic therapy and hepatectomy; UH,

upfront hepatectomy; AFP,  $\alpha$ -fetoprotein; HB, hemoglobin; TB, total bilirubin; ALB, albumin; ALT, alanine aminotransferase; AST, aspartate aminotransferase;  $\gamma$ -GT, gamma-glutamyl transferase; PT, prothrombin time; INR, international normalized ratio.
